# Supplementary material
Source: publisher figshare collection journal article supplement (https://acs.figshare.com/ndownloader/files/5200324)
Supplement: Supplementary file 1 [file 5200324]

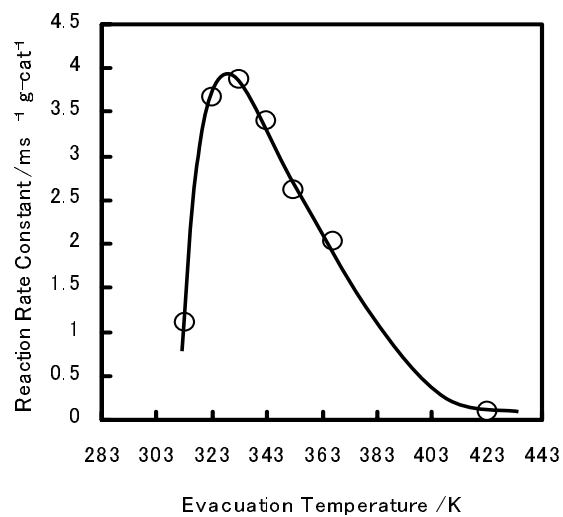

*Supplemental Figure 1.* Effect of evacuation temperature on the catalytic activity of MCM-41 for acetalization of cyclohexanone. The catalyst was evacuated at each temperature for 1 h before use in the catalytic run. Experimental conditions: cyclohexanone 2.0 mmol, methanol 5.0 ml, catalyst 30 mg, reaction temp. 298 K.
